# Supplementary material for: Self-sampling strategies (with/without digital innovations) in populations at risk ofChlamydia trachomatisandNeisseria gonorrhoeae: a systematic review and meta-analyses
Source: HighWire-hosted journal article supplement (doi:10.1136/sextrans-2022-055557), 2023-03-29
Supplement: sextrans-2022-055557supp002_data_supplement.pdf [file sextrans-2022-055557supp002_data_supplement.pdf]

**Table 1. Summary table of included studies (n=37) and the self-sampling intervention evaluated.**

| Reference                                 | Study Design        | Sample size        | Country | Study population                                                 | Type of digital intervention | Sampling site                | Intervention description                                                                                                                                                             |
|-------------------------------------------|---------------------|--------------------|---------|------------------------------------------------------------------|------------------------------|------------------------------|--------------------------------------------------------------------------------------------------------------------------------------------------------------------------------------|
| <b>Arias et al. 2016<sup>1</sup></b>      | Cross-sectional DAS | 189                | Canada  | Women who visited the youth street clinic or the abortion clinic | None                         | Vaginal                      | Participants were given the choice between self-sampling or conventional sampling by physician.                                                                                      |
| <b>Bernstein et al. 2011<sup>2</sup></b>  | Cross-sectional DAS | 480                | USA     | English-speaking MSM                                             | None                         | Pharyngeal                   | Participants presenting to the clinic were tested using conventional testing and then asked to perform self-sampling without examiner present.                                       |
| <b>Berry and Stanley 2017<sup>3</sup></b> | Cross-sectional DAS | 1306               | UK      | Men visiting a sexual health clinic                              | None                         | Meatal                       | Participants were requested to provide a self-sampled swab and a urine sample for conventional testing.                                                                              |
| <b>Camus et al. 2021<sup>4</sup></b>      | Cross-sectional DAS | 1028               | France  | Women visiting STI clinics                                       | None                         | Vaginal                      | Women presenting with vaginal/cervical sampling indications were invited to participate to test the non-inferiority of self-sampling compared to conventional sampling by clinician. |
| <b>Chai et al. 2010<sup>5</sup></b>       | Cross-sectional     | 501                | USA     | Men $\geq 14$ years                                              | Website-based                | Urine and urethral           | Participants ordered free-sampling kits online and were provided with a questionnaire.                                                                                               |
| <b>Charin et al. 2021<sup>6</sup></b>     | Cross-sectional     | 5061 returned kits | UK      | Asymptomatic cisgender MSMs                                      | Website-based                | Rectal, pharyngeal and urine | Self-testing kits results were analysed from an administrative database to determine prevalence of extra-genital CT/GC.                                                              |

|                                               |                 |     |         |                                                                                                    |      |                      |                                                                                                             |
|-----------------------------------------------|-----------------|-----|---------|----------------------------------------------------------------------------------------------------|------|----------------------|-------------------------------------------------------------------------------------------------------------|
| <b>Chernesky et al. 2014<sup>7</sup></b>      | Cross-sectional | 562 | Canada  | Women attending a gynaecology clinic or youth health clinic                                        | None | Vaginal and cervical | Participants were asked to self-sample a vaginal swab and two conventional swabs were taken.                |
| <b>Chinock et al. 2020<sup>8</sup></b>        | Cohort DAS      | 533 | USA     | Emergency department attendees (Spanish- and English-speaking)                                     | None | Vaginal              | Participants were given the option to provide a self-sample in addition to conventional testing.            |
| <b>Conejero et al. 2013<sup>9</sup></b>       | Cross-sectional | 344 | Chile   | Women aged 18-25 who are sexually active and not pregnant or menstruating at the time of the study | None | Vaginal              | Participants who attended the clinic were given a self-sampling test and surveyed.                          |
| <b>De Baetselier et al. 2019<sup>10</sup></b> | Cohort DAS      | 213 | Belgium | MSM using PrEP                                                                                     | None | Urine                | Participants were tested using conventional testing at 3 biological sites and asked to self-sample at home. |

|                                                |                        |      |                 |                                                                                                                                                        |                                        |                                              |                                                                                                                                                                                         |
|------------------------------------------------|------------------------|------|-----------------|--------------------------------------------------------------------------------------------------------------------------------------------------------|----------------------------------------|----------------------------------------------|-----------------------------------------------------------------------------------------------------------------------------------------------------------------------------------------|
| <b>Dukers-Muijers et al. 2020<sup>11</sup></b> | Cohort                 | 4916 | the Netherlands | Women, who were 18 years or older, diagnosed with a vaginal or rectal CT infection during the inclusion period, and negative for HIV, syphilis, and GC | Online questionnaire and text messages | Vaginal and rectal                           | Participants were communicated a website link to the study via a text message. They self-collected at home or at the clinic and received reminder texts during the length of the study. |
| <b>Estcourt et al. 2017<sup>12</sup></b>       | Cross-sectional<br>DAS | 2143 | UK              | Anyone aged 16–24 years and able to read and understand English                                                                                        | Website and text                       | Urine (males) or vulvovaginal (females)      | Participants were given the choice to access all care online or request in-person counselling/treatment at multiple steps of the pathway.                                               |
| <b>Galvez et al. 2021<sup>13</sup></b>         | Cohort                 | 206  | Peru            | Women between 18 and 50 years of age                                                                                                                   | None                                   | Endocervical                                 | Participants conducted a self-sampled test and conventional test at the clinic. They were asked to fill a questionnaire.                                                                |
| <b>Grabert et al. 2022<sup>14</sup></b>        | Cross-sectional<br>DAS | 399  | Kenya           | FSWs with and without HIV                                                                                                                              | None                                   | Vaginal                                      | Women who engage in sex work were randomized to using wet and dry brushes sampling methods compared to conventional sampling to determine test positivity.                              |
| <b>Grandahl et al. 2020<sup>15 16</sup></b>    | Cross-sectional        | 1785 | Sweden          | Anyone over the age of 15                                                                                                                              | Website-based                          | Urine, vagina, cervix, rectum, throat, other | Participants ordered a free self-sampling kit and filled a questionnaire on demographics, behaviour and about their experience with the test.                                           |
| <b>Habel et al. 2018<sup>11</sup></b>          | Cross-sectional        | 3082 | USA             | Male and female university students                                                                                                                    | None                                   | Urine (men), vaginal (women)                 | Students accessing the healthcare centre could request a self-testing option as opposed to conventional testing and were surveyed.                                                      |

|                                               |                     |      |             |                                                                            |                |                              |                                                                                                                                                                                                             |
|-----------------------------------------------|---------------------|------|-------------|----------------------------------------------------------------------------|----------------|------------------------------|-------------------------------------------------------------------------------------------------------------------------------------------------------------------------------------------------------------|
| <b>Harvey-Lavoie et al. 2021<sup>17</sup></b> | Cross-sectional     | 1179 | Canada      | Cis- and trans-GBMs                                                        | None           | Rectal, pharyngeal and urine | Respondent driven sampling was used to recruit GBM who self-sampled to detect CT/NG. Prevalence estimates of CT/NG, overall and by anatomical site were calculated and respondent-driven sampling-adjusted. |
| <b>Holland-Hall et al. 2002<sup>18</sup></b>  | Cross-sectional     | 133  | USA         | Juvenile correctional facility detainees aged 12-17 years                  | None           | endocervical                 | Participants were tested by conventional testing and/or invited to perform a self-test swab.                                                                                                                |
| <b>Kanji et al. 2016<sup>19</sup></b>         | Cross-sectional DAS | 606  | Canada      | Female STI clinic attendees aged 15 to 52 years from three Alberta clinics | None           | Urine and endocervical       | Participants accessing the clinic were invited to self-collect a sample or by a nurse.                                                                                                                      |
| <b>Ladd et al. 2014<sup>20</sup></b>          | Cross-sectional     | 205  | USA         | Women who returned rectal testing kits ordered through a website           | Website-based  | Vaginal and rectal           | Participants ordered the rectal and vaginal free-sampling kits online and were provided with a questionnaire.                                                                                               |
| <b>Leenen et al. 2020<sup>21,22</sup></b>     | Cross-sectional     | 129  | Netherlands | Dutch-speaking HIV positive MSM 18 years of age or older                   | Text messaging | Oral, anorectal, urinal      | Home sampling kits were offered to clinic patients and text-message reminders were sent. Results were communicated via text or phone call.                                                                  |
| <b>Lippman et al. 2007<sup>15</sup></b>       | RCT                 | 818  | Brazil      | Low-income women                                                           | None           | Vaginal                      | Participants were randomized to receive home-based collection kits or clinic based self collection and conventional testing.                                                                                |

|                                                 |                     |      |         |                                                           |                                                                |                                                |                                                                                                                                                                     |
|-------------------------------------------------|---------------------|------|---------|-----------------------------------------------------------|----------------------------------------------------------------|------------------------------------------------|---------------------------------------------------------------------------------------------------------------------------------------------------------------------|
| <b>Lockhart et al. 2018</b> <sup>23</sup>       | Cohort DAS          | 350  | Kenya   | Female sex workers                                        | None                                                           | Cervicovaginal                                 | Participants self-collected a sample and healthcare provider collected a sample.                                                                                    |
| <b>Mabonga et al. 2021</b> <sup>24</sup>        | Cross-sectional     | 363  | Uganda  | People living with HIV 14 years and older                 | None                                                           | Vaginal and/or urine                           | Participants were asked to provide a sample and a questionnaire.                                                                                                    |
| <b>Masek et al. 2009</b> <sup>25</sup>          | Cross-sectional DAS | 2000 | USA     | Anyone who accessed the website, no restrictions provided | Internet-based kit request and delivery of results             | Vaginal                                        | Self-sampling kits and questionnaires were ordered by participants through a website and shipped for testing and results were communicated by phone.                |
| <b>McCartney et al. 2022</b> <sup>26</sup>      | Cross-sectional     | 23   | Brazil  | Transgender women                                         | None                                                           | Rectal, urethral, vaginal pharyngeal and urine | Consecutive potential participants from an existing cohort study were invited interview to determine the acceptability and practicability of mucosal STI screening. |
| <b>Nodjikouambaye et al. 2019</b> <sup>27</sup> | Cross-sectional DAS | 251  | Chad    | Adult women                                               | None                                                           | Vaginal                                        | Participants randomized to a conventional testing with cervical swab or self-sampling with a veil.                                                                  |
| <b>Perkins et al. 2013</b> <sup>28</sup>        | Cross-sectional     | 514  | USA     | HIV negative adults                                       | None                                                           | Urine, throat and/or rectal                    | Self-sample swabs were completed by participants, and they filled a survey.                                                                                         |
| <b>Platteau et al. 2022</b> <sup>29</sup>       | Cross-sectional     | 154  | Belgium | Male clients of sex workers                               | Online questionnaire and text message communication of results | Rectal and urine                               | Time Location Sampling was used to recruit clients of sex workers who were interested in getting tested for STIs to determine positivity.                           |

|                                                  |                     |      |        |                                                     |                                                                      |                              |                                                                                                                                                                            |
|--------------------------------------------------|---------------------|------|--------|-----------------------------------------------------|----------------------------------------------------------------------|------------------------------|----------------------------------------------------------------------------------------------------------------------------------------------------------------------------|
| <b>Rahib et al. 2022</b> <sup>30</sup>           | Cross-sectional     | 3428 | France | HIV negative MSMs                                   | App-based recruitment, online recruitment and text message reminders | Rectal, pharyngeal and urine | Participants were recruited online to study the feasibility of a at-home screening program, the rate of positive test results, and the factors associated with positivity. |
| <b>Regimbal-Éthier et al. 2018</b> <sup>31</sup> | Cross-sectional     | 708  | Canada | Anyone with access to the website                   | Online questionnaire                                                 | Not specified                | Participants accessing the website completed a self-assessment and presented to the clinic for a self-sampling collection.                                                 |
| <b>Sambri et al. 2017</b> <sup>32</sup>          | Cross-sectional     | 78   | Italy  | Employees of a private industry                     | None                                                                 | Vaginal                      | Subjects were given two self-sampling diagnostic tools to conduct at home and a questionnaire.                                                                             |
| <b>Schick et al. 2015</b> <sup>33</sup>          | Cross-sectional     | 80   | USA    | WSWM                                                | None                                                                 | Oral, vaginal and/or anal    | Participants were interviewed and performed self-sampling swab tests, notified of results by their method of choice and email.                                             |
| <b>Sexton et al. 2013</b> <sup>34</sup>          | Cross-sectional DAS | 374  | USA    | MSM who had sex with a man in the previous 6 months | None                                                                 | Pharyngeal and rectal        | Patients requesting a STI test performed self-sampling kit after viewing written and pictorial instructions and were also screened by clinic staff.                        |

|                                                |                     |      |                 |                                                                 |      |                                                                                |                                                                                                                                              |
|------------------------------------------------|---------------------|------|-----------------|-----------------------------------------------------------------|------|--------------------------------------------------------------------------------|----------------------------------------------------------------------------------------------------------------------------------------------|
| <b>Shipitsyna et al. 2013<sup>35</sup></b>     | Cross-sectional     | 1207 | Russia          | Sexually active attendees of a youth centre (15 – 25 years old) | None | Vaginal (female) and urine (male)                                              | Participants were asked to provide a self-sample and a questionnaire.                                                                        |
| <b>Silva et al. 2020<sup>36</sup></b>          | Cross-sectional     | 680  | Portugal        | Women of childbearing age from 2010 to 2016                     | None | Vaginal                                                                        | Participants were asked to provide a self-sample and fill a questionnaire.                                                                   |
| <b>Sultan et al. 2016<sup>37</sup></b>         | Cross-sectional     | 154  | UK              | Men and women                                                   | None | Not specified                                                                  | Participants that had tested positive for a conventional test at the clinic were asked to provide a self-sample done at home.                |
| <b>van de Wijgert et al. 2006<sup>38</sup></b> | RCT DAS             | 450  | South Africa    | Adult women                                                     | None | Vaginal                                                                        | Participants were surveyed and asked to self-sample with one tampon, or two swabs observed by nurse and nurse collected three vaginal swabs. |
| <b>van der Helm et al. 2009<sup>39</sup></b>   | Cross-sectional DAS | 2394 | the Netherlands | MSM and women who attended two STI clinics                      | None | Rectal                                                                         | Participants were invited to test with self-sampling in addition to conventional testing and filled a questionnaire.                         |
| <b>Weng et al. 2022<sup>40</sup></b>           | Cross-sectional     | 306  | China           | MSMs visiting an outreach centre                                | None | Rectal and urine                                                               | Rectal-self-collection was offered in 2 non-clinic settings to study prevalence of CT/GC and self-sampling acceptability.                    |
| <b>Wiesenfeld et al. 2001<sup>41</sup></b>     | Cross-sectional     | 228  | USA             | Female high-school students                                     | None | Vaginal                                                                        | Participants were asked to self-sample for a STI test and surveyed.                                                                          |
| <b>Wilson et al. 2020<sup>42</sup></b>         | Cross-sectional DAS | 1793 | UK              | Women and MSM 16 years of age or older                          | None | Pharyngeal, rectal, and first-catch urine (males)/vulvovaginal swabs (females) | Participants presenting to the clinic were tested using self-sampling in addition to conventional testing and filled a questionnaire.        |

|                                        |                        |      |       |                                              |                                                                   |                                                                                         |                                                                                                                                                                                                                                                               |
|----------------------------------------|------------------------|------|-------|----------------------------------------------|-------------------------------------------------------------------|-----------------------------------------------------------------------------------------|---------------------------------------------------------------------------------------------------------------------------------------------------------------------------------------------------------------------------------------------------------------|
| <b>Wilson et al. 2020<sup>43</sup></b> | Cross-sectional<br>DAS | 1793 | UK    | Women and MSM<br>16 years of age or<br>older | None                                                              | Pharyngeal, rectal, and<br>first-catch urine<br>(males)/vulvovaginal<br>swabs (females) | Participants presenting to the<br>clinic were tested using self-<br>sampling in addition to<br>conventional testing and filled<br>a questionnaire.                                                                                                            |
| <b>Wong et al. 2022<sup>44</sup></b>   | Cohort                 | 204  | China | HIV negative<br>MSMs                         | Website-based<br>test ordering<br>and text<br>message<br>reminder | Rectal, pharyngeal and<br>urine                                                         | HIV-negative MSM aged 18<br>years or older made<br>appointments on a designated<br>website for baseline and<br>follow-up visits at 3-monthly<br>intervals to determine<br>engagement with self-sampling<br>program and prevalence of<br>CT/NG and other STIs. |
| <b>Wood et al. 2014<sup>45</sup></b>   | Cohort                 | 30   | UK    | MSM attending a<br>sauna                     | None                                                              | Pharyngeal, urine and<br>rectal                                                         | Participants had the option of<br>choosing a self-sampling kit at<br>home, at the site of outreach or<br>conventional testing at the site<br>of outreach.                                                                                                     |

MSM: men who have sex with men; PrEP: pre-exposure prophylaxis; CT: *Chlamydia trachomatis*; HIV: human immunodeficiency virus; GC: *Neisseria gonorrhoeae*; STI: sexually transmitted infection; WSWM: women who have sex with women and men

1. Arias MJ, Dan; Gilchrist, Jodi; Luinstra, Kathy; Li, Jenny; Smieja, Marek; Chernesky, Max A. Ease, Comfort, and Performance of the HerSwab Vaginal Self-Sampling Device for the Detection of *Chlamydia trachomatis* and *Neisseria gonorrhoeae*. *Sexually Transmitted Diseases* 2016;**43**(2):125-29.
2. Bernstein KTK, Robert P.; Philip, Susan; Freeman, Alexandra H.; Rauch, Leah M.; Klausner, Jeffrey D. Evaluation of self-collected versus clinician-collected swabs for the detection of *chlamydia trachomatis* and *neisseria gonorrhoeae* pharyngeal infection among men who have sex with men. *Sexually Transmitted Diseases* 2011;**38**(11):1036-39.
3. Berry L, Stanley B. Comparison of self-collected meatal swabs with urine specimens for the diagnosis of *Chlamydia trachomatis* and *Neisseria gonorrhoeae* in men. *J Med Microbiol* 2017;**66**(2):134-36.
4. Camus C, Penaranda G, Khiri H, et al. Acceptability and efficacy of vaginal self-sampling for genital infection and bacterial vaginosis: A cross-sectional study. *PLoS One* 2021;**16**(11 November) (no pagination).



5. Chai SJA, Bulbulgul; Barnes, Mathilda; Jett-Goheen, Mary; Quinn, Nicole; Agreda, Patricia; Hogan, Terry; Gaydos, Charlotte A.; Whittle, Pamela; Jenkins, Wiley D.; Rietmeijer, Cornelis A. Internet-based screening for sexually transmitted infections to reach nonclinic populations in the community: Risk factors for infection in men. *Sexually Transmitted Diseases* 2010;**37**(12):756-63.
6. Charin G, Symonds Y, Scholfield C, et al. Three-site screening for STIs in men who have sex with men using online self-testing in an English sexual health service. *Sex transm infect* 2022.
7. Chernesky M. Comparison of a new aptima specimen collection and transportation kit to I-pap for detection of C trachomatis, N gonorrhoeae and T vaginalis in cervical and vaginal specimens. *Sexually Transmitted Infections* 2011;**87**(SUPPL. 1):A73-A74.
8. Chinnock BFM, Jessica; Yore, Mackensie; Lopez, Diana; Farshidpour, Leyla; Kremer, Mallory. Vaginal self-sampling is not inferior to provider endocervical sampling for gonorrhea and chlamydia diagnosis. *Academic Emergency Medicine* 2020;**27**(Supplement 1):S214-S15.
9. Conejero Roos CC, Gigliola; Merino, Paulina M.; Castro, Magdalena; Schulin-Zeuthen, Carolina; Bollmann, Josefina; Hidalgo, Camila. Screening of Neisseria gonorrhoeae and Chlamydia trachomatis using techniques of self collected vaginal sample in young women. *Revista Chilena de Infectologia* 2013;**30**(5):489-93.
10. De Baetselier IS, Hilde; Abdellati, Said; De Deken, Benedicte; Cuylaerts, Vicky; Crucitti, Tania; Reyniers, Thijs; Vuylsteke, Bea. Evaluation of the 'Colli-Pee', a first-void urine collection device for self-sampling at home for the detection of sexually transmitted infections, versus a routine clinic-based urine collection in a one-to-one comparison study design: Efficacy and acceptability among MSM in Belgium. *BMJ Open* 2019;**9**(4):e028145.
11. Dukers-Muijers NHTM, Heijman T, Götz HM, et al. Participation, retention, and associated factors of women in a prospective multicenter study on Chlamydia trachomatis infections (FemCure). *PLoS One* 2020;**15**(3):e0230413.
12. Estcourt CS, Gibbs J, Sutcliffe LJ, et al. The eSexual Health Clinic system for management, prevention, and control of sexually transmitted infections: exploratory studies in people testing for Chlamydia trachomatis. *Lancet Public Health* 2017;**2**(4):e182-e90.
13. Galvez TM, Flores JA, Pérez DG, et al. Concordance between self-sampling and standar endocervical sample collection to identify sexual transmission infections in an urban-rural area of Peru. *Rev Peru Med Exp Salud Publica* 2021;**38**(1):83-88.
14. Grabert BK, Islam JY, Kabare E, et al. Testing for Sexually Transmitted Infection Using Wet and Dry Self-Collected Brush Samples Among Women in Mombasa, Kenya. *Sexually Transmitted Diseases* 2022;**49**(9):E100-E03.
15. Grandahl ML, Margareta; Mohammad, Jamila; Herrmann, Bjorn. Users' opinions of internet-based self-sampling tests for chlamydia trachomatis and neisseria gonorrhoeae in Sweden. *Acta Dermato-Venereologica* 2020;**100**(18):1-6.
16. Habel MA, Brookmeyer KA, Oliver-Veronesi R, et al. Creating Innovative Sexually Transmitted Infection Testing Options for University Students: The Impact of an STI Self-testing Program. *Sex Transm Dis* 2018;**45**(4):272-77.
17. Harvey-Lavoie S, Apelian H, Labbé A-C, et al. Community-Based Prevalence Estimates of Chlamydia trachomatis and Neisseria gonorrhoeae Infections Among Gay, Bisexual, and Other Men Who Have Sex With Men in Montréal, Canada. *Sex Transm Dis* 2021;**48**(12):939-44.
18. Holland-Hall CMW, H. C.; Murray, P. J. Self-collected vaginal swabs for the detection of multiple sexually transmitted infections in adolescent girls. *Journal of Pediatric and Adolescent Gynecology* 2002;**15**(5):307-13.
19. Kanji J, Gee S, Smyczek P, et al. Evaluation of Vaginal Specimens for the Detection of C. Trachomatis (CT) and N. Gonorrhoeae (GC) in High Risk Females Attending Sexually Transmitted Infection (STI) Clinics in Alberta, Canada. *STD prevention conference* 2016.

20. Ladd JH, Yu-Hsiang; Barnes, Mathilda; Quinn, Nicole; Jett-Goheen, Mary; Gaydos, Charlotte A. Female users of internet-based screening for rectal STIs: Descriptive statistics and correlates of positivity. *Sexually Transmitted Infections* 2014;**90**(6):485-90.
21. Leenen JvL, I. H. M.; Wolffs, P. F. G.; Hoebe, C. J. P. A.; Ackens, R. P.; Posthouwer, D.; Dukers-Muijers\*, N. H. T. M. Pilot implementation of a home-care programme with chlamydia, gonorrhoea, hepatitis B, and syphilis self-sampling in HIV-positive men who have sex with men. *BMC Infectious Diseases* 2020;**20**(1):925.
22. Lippman SA, Jones HE, Luppi CG, et al. Home-based self-sampling and self-testing for sexually transmitted infections: acceptable and feasible alternatives to provider-based screening in low-income women in São Paulo, Brazil. *Sex Transm Dis* 2007;**34**(7):421-8.
23. Lockhart AP, Matt; Ting, Jie; Campbell, Sara; Mugo, Nelly; Kwatampora, Jessie; Chitwa, Michael; Kimani, Joshua; Gakure, Anne; Smith, Jennifer S. Prospective Evaluation of Cervicovaginal Self- and Cervical Physician Collection for the Detection of Chlamydia trachomatis, Neisseria gonorrhoeae, Trichomonas vaginalis, and Mycoplasma genitalium Infections. *Sexually Transmitted Diseases* 2018;**45**(7):488-93.
24. Mabonga EM, Joshua K.; Nabaggala, Maria S.; Kiragga, Agnes; Kisakye, Jennifer; Manabe, Yukari C.; Elbireer, Ali; Gaydos, Charlotte A.; Taylor, Chris; Parkes-Ratanshi, Rosalind. Prevalence and predictors of asymptomatic Chlamydia trachomatis and Neisseria gonorrhoeae in a Ugandan population most at risk of HIV transmission. *International Journal of STD and AIDS* 2021;**32**(6):510-16.
25. Masek BJA, Nick; Quinn, Nicole; Aumakhan, Bulbul; Holden, Jeff; Hardick, Andrew; Agreda, Patricia; Barnes, Mathilda; Gaydos, Charlotte A. Performance of three nucleic acid amplification tests for detection of Chlamydia trachomatis and Neisseria gonorrhoeae by use of self-collected vaginal swabs obtained via an internet-based screening program. *Journal of Clinical Microbiology* 2009;**47**(6):1663-67.
26. McCartney DJ, Pinheiro TF, Gomez JL, et al. Acceptability of self-sampling for etiological diagnosis of mucosal sexually transmitted infections (STIs) among transgender women in a longitudinal cohort study in São Paulo, Brazil. *Braz J Infect Dis* 2022;**26**(3):102356.
27. Nodjikoambaye ZAMB, Ralph-Sydney; Veyer, David; Robin, Leman; Compain, Fabrice; Pere, Helene; Belec, Laurent; Sadjoli, Damtheou; Adawaye, Chatte; Tonen-Wolyec, Serge; Moussa, Ali Mahamat; Koyalta, Donato. Accuracy of curable sexually transmitted infections and genital mycoplasmas screening by multiplex real-time PCR using a self-collected veil among adult women in Sub-Saharan Africa. *Infectious Diseases in Obstetrics and Gynecology* 2019;**2019**:8639510.
28. Perkins RCD, A.; Douglass, G.; Ta, V.; Fomundam, M.; Li, Y.; Plankey, M. Sexually transmitted infection screening among HIV-negative men and women seeking HIV-testing only: Missed opportunity for HIV prevention? *Sexually Transmitted Infections* 2013;**89**(SUPPL. 1).
29. Platteau T, De Baetselier I, Van Mieghem H, et al. Sexually Transmitted Infections and Associated Risk Factors Among Male Clients of Sex Workers: A Cross-Sectional Pilot Project in Antwerp, Belgium. *Front Reprod Health* 2022;**4**:837102-02.
30. Rahib D, Bercot B, Delagreverie H, et al. Online self-sampling kits for human immunodeficiency virus and other sexually transmitted infections: Feasibility, positivity rates, and factors associated with infections in France. *Int J STD AIDS* 2022;**33**(4):355-62.
31. Regimbal-Ethier MB, K.; To, V.; Quesnel, M. Prelib: Evaluating a newly launched Canadian provider of innovative internet-based services for self-directed HIV and STI screening. *HIV Medicine* 2019;**20**(Supplement 9):195.
32. Sambri VD, Giorgio; Farabegoli, Patrizia. How to facilitate and improve screening of sexually-transmitted infections in women population. *Sexually Transmitted Infections* 2017;**93**(Supplement 2):A64-A65.
33. Schick VVDP, Barbara; Dodge, Brian; Baldwin, Aleta; Dennis Fortenberry, J. A mixed methods approach to assess the likelihood of testing for STI using self-collected samples among behaviourally bisexual women. *Sexually Transmitted Infections* 2015;**91**(5):329-33.

34. Sexton MEB, Joseph J.; Nakagawa, Keisuke; Perkins, Rodney; Baker, Daniel C.; Jucha, Brian; Li, Ying; Plankey, Michael W.; Slack, Rebecca S.; Arora, Sameer. How reliable is self-testing for gonorrhea and chlamydia among men who have sex with men? *Journal of Family Practice* 2013;**62**(2):70-78.
35. Shipitsyna EK, T.; Ryzhkova, O.; Krysanova, A.; Grigoryev, A.; Savicheva, A.; Ryzhikh, P.; Guschin, A.; Unemo, M. Prevalence of sexually transmitted infections in young people in St. Petersburg, Russia, as Determined using self-collected non-invasive specimens. *Sexually Transmitted Infections* 2013;**89**(SUPPL. 1).
36. Silva JT, Ana Luisa; Cerqueira, Fatima; Campaignha, Rui; Amorim, Jose; Medeiros, Rui. Prevalence of Neisseria gonorrhoeae and Trichomonas vaginalis in Portuguese women of childbearing age. *Journal of Obstetrics and Gynaecology* 2021;**41**(2):254-58.
37. Sultan BO, Clare; Brima, Nataliya; Benn, Paul; Schembri, Gabriel; Patel, Hemi; Ison, Cathy. The acceptability of self-sampling at home for chlamydia trachomatis and neisseria gonorrhoeae in men and women; results from the feasibility study to determine the time taken for naats tests to become negative following treatment for chlamydia trachomatis and neisseria gonorrhoeae in men and women. *Sexually Transmitted Infections* 2016;**92**(Supplement 1):A87.
38. Van De Wijgert JJ, Heidi; Altini, Lydia; De Kock, Alana; Young, Taryn; Williamson, Anna-Lise; Hoosen, Anwar; Coetzee, Nicol. Two methods of self-sampling compared to clinician sampling to detect reproductive tract infections in Gugulethu, South Africa. *Sexually Transmitted Diseases* 2006;**33**(8):516-23.
39. van der Helm JJ, Hoebe CJ, van Rooijen MS, et al. High performance and acceptability of self-collected rectal swabs for diagnosis of Chlamydia trachomatis and Neisseria gonorrhoeae in men who have sex with men and women. *Sex Transm Dis* 2009;**36**(8):493-7.
40. Weng R, Ning N, Zhang C, et al. Acceptability of rectal self-sampling in non-clinical venues for chlamydia and gonorrhea testing among men who have sex with men: A cross-sectional study in Shenzhen, China. *Front Public Health* 2022;**10**:992773-73.
41. Wiesenfeld HCL, Donna L. B.; Heine, R. Phillips; Krohn, Marijane A.; Bittner, Heather; Kellinger, Kathleen; Shultz, Maryann; Sweet, Richard L. Self-collection of vaginal swabs for the detection of chlamydia, gonorrhea, and trichomoniasis: Opportunity to encourage sexually transmitted disease testing among adolescents. *Sexually Transmitted Diseases* 2001;**28**(6):321-25.
42. Wilson JDW, Harriet E.; Loftus-Keeling, Michelle; Ward, Helen; Davies, Bethan; Vargas-Palacios, Armando; Hulme, Claire; Wilcox, Mark H. Swab-yourself trial with economic monitoring and testing for infections collectively (SYSTEMATIC): Part 1. A diagnostic accuracy, and cost-effectiveness, study comparing clinician-taken versus self-taken rectal and pharyngeal samples for the diagnosis of gonorrhoea and chlamydia. *Clinical infectious diseases : an official publication of the Infectious Diseases Society of America* 2020.
43. Wilson JD, Wallace HE, Loftus-Keeling M, et al. Swab-yourself trial with economic monitoring and testing for infections collectively (SYSTEMATIC): Part 2. A diagnostic accuracy, and cost-effectiveness, study comparing rectal, pharyngeal and urogenital samples analysed individually, versus as a pooled specimen, for the diagnosis of gonorrhoea and chlamydia. *Clin Infect Dis* 2020.
44. Wong NS, Kwan TH, Chan DPC, et al. Regular Testing of HIV and Sexually Transmitted Infections With Self-Collected Samples From Multiple Anatomic Sites to Monitor Sexual Health in Men Who Have Sex With Men: Longitudinal Study. *JMIR Form Res* 2022;**6**(11):e40996.
45. Wood ME, R.; Grobicki, M. Outreach sexual infection screening and postal tests in men who have sex with men: How do they compare with clinicbased screening? *HIV Medicine* 2014;**15**(SUPPL. 3):32.
