# Supplementary material for: Self-sampling strategies (with/without digital innovations) in populations at risk ofChlamydia trachomatisandNeisseria gonorrhoeae: a systematic review and meta-analyses
Source: HighWire-hosted journal article supplement (doi:10.1136/sextrans-2022-055557), 2023-03-29
Supplement: sextrans-2022-055557supp004_data_supplement.pdf [file sextrans-2022-055557supp004_data_supplement.pdf]

**Supplementary Table 3. Molecular test type, index test, reference test, case positivity, sensitivity, and specificity values of diagnostic accuracy studies evaluating the performance of self-sampled CT/GC tests.**

| <i>Chlamydia trachomatis</i>                 | Molecular test           | Index test                    | Reference test                  | Case positivity | Sensitivity (95% CIs) | Specificity (95% CIs) |
|----------------------------------------------|--------------------------|-------------------------------|---------------------------------|-----------------|-----------------------|-----------------------|
| <b>Arias et al. 2016<sup>1</sup></b>         | HerSwab + Aptima combo 2 | Self-taken vaginal swab       | Clinician taken vaginal swab    | 5.3             | 76.9                  | 96.0                  |
| <b>Bernstein et al. 2011<sup>2</sup></b>     | Aptima combo 2           | Self-taken pharyngeal swab    | Clinician taken pharyngeal swab | 1.1             | 83.3                  | 99.6                  |
| <b>Berry and Stanley 2017<sup>3</sup></b>    | BD Viper XTR             | Self-taken penile meatal swab | Self-collected urine sample     | 8.3             | 89.4                  | 99.6                  |
| <b>Camus et al. 2021<sup>4</sup></b>         | Copan ESwab & Cobas 4800 | Self-taken vaginal swab       | Clinician taken vaginal swab    | 3.3             | 100 (N/A)             | 85.7 (59.8–100)       |
| <b>Chai et al. 2010<sup>5</sup></b>          | Aptima Gen-Probe,        | Self-taken urine and urethral |                                 | 13.0            |                       |                       |
| <b>Charin et al. 2021<sup>6</sup></b>        | Aptima Combo 2           | Self-taken urine              |                                 | 1.7             |                       |                       |
|                                              |                          | Self-taken pharyngeal swab    |                                 | 0.9             |                       |                       |
|                                              |                          | Self-taken rectal             |                                 | 4.3             |                       |                       |
| <b>Chernesky, M. et al. 2014<sup>7</sup></b> | Aptima combo2            | Self-taken cervicovaginal     |                                 | 3.9             | 100.0                 | 100.0                 |

|                                               |                                    |                                   |                                   |      |                  |                   |
|-----------------------------------------------|------------------------------------|-----------------------------------|-----------------------------------|------|------------------|-------------------|
| <b>Chinnock, B. et al. 2020<sup>8</sup></b>   | Cepheid Xpert CT, NG               | Self-taken vaginal swab           | Clinician taken endocervical swab | 9.7  | 94.3 (84.0–99.0) | 98.9 (98.0–100.0) |
| <b>De Baetselier et al. 2019<sup>9</sup></b>  | Abbott Real Time (RT) CT, NG assay | Self-taken urine at home next day | Self-taken urine at clinic        | 1.3  | 85.7             | 99.3              |
| <b>Estcourt et al. 2017<sup>10</sup></b>      | Not specified                      | Self-taken urine or vaginal swab  |                                   | 6.3  |                  |                   |
| <b>Galvez et al. 2021<sup>11</sup></b>        | Aptima combo 2                     | Self-taken vaginal swab           | Clinician taken endocervical swab | 2.9  | 85.7             | 100.0             |
| <b>Grabert et. al 2022<sup>12</sup></b>       | Aptima Combo 2                     | Self-taken wet vaginal swab       | Clinician taken vaginal swab      | 3.5  | 45.45            | 97.68             |
|                                               |                                    | Self-taken dry vaginal swab       |                                   | 0.5  | 9.09             | 99.74             |
| <b>Harvey-Lavoie et al. 2021<sup>13</sup></b> | COBAS 4800 CT/NG                   | Self -taken urine                 |                                   | 0.8  |                  |                   |
|                                               |                                    | Self-taken rectal                 |                                   | 2.9  |                  |                   |
| <b>Holland-Hall et al. 2002<sup>14</sup></b>  | COBAS Amplicor CT, NG Test         | Self-taken cervicovaginal         |                                   | 11.3 |                  |                   |
| <b>Kanji et al. 2016<sup>15</sup></b>         | Aptima 2 combo                     | Self-taken cervical               | Self-taken urine                  |      | 86.7             | 99.1              |
| <b>Ladd et al. 2014<sup>16</sup></b>          | Aptima Gen-Probe,                  | Self-taken vaginal and rectal     |                                   | 12.7 |                  |                   |

|                                                |                                                               |                                                 |                                     |      |       |      |
|------------------------------------------------|---------------------------------------------------------------|-------------------------------------------------|-------------------------------------|------|-------|------|
| <b>Lockhart et al. 2018<sup>17</sup></b>       | Aptima Cervical Specimen Collection and Transport cytobrush   | Self-taken cervicovaginal cytobrush             | Clinician-taken cervicovaginal      | 2.7  | 92.9  | 98.7 |
| <b>Mabonga et al. 2021<sup>18</sup></b>        | ProbeTecTM ET CT, NG test;                                    | Self-taken vaginal and urine                    |                                     | 1.7  |       |      |
| <b>Masek et al. 2009<sup>19</sup></b>          | Aptima combo 2 or Probetec SDA                                | Self-taken vaginal                              | Both test having concordant results | 7.5  | 100.0 | 98.2 |
| <b>Nodjikouambaye et al. 2019<sup>20</sup></b> | Allplex STI Essential Assay, Seegene,                         | Self-taken veil-based cervicovaginal            | Clinician taken endocervical swab   | 1.2  | 100.0 | 99.6 |
| <b>Perkins et al. 2013<sup>21</sup></b>        | Not reported                                                  | Self-taken rectal, pharyngeal and urine (men)   |                                     | 10.7 |       |      |
|                                                | Not reported                                                  | Self-taken rectal, pharyngeal and urine (women) |                                     | 12.9 |       |      |
| <b>Platteau et al. 2022<sup>22</sup></b>       | Abbott RealTime CT/NG assay                                   | Self-taken urine or rectal swab                 |                                     | 5.2  |       |      |
| <b>Rahib et al. 2022<sup>23</sup></b>          | Cobas R PCR Dual Swab                                         | Self-taken rectal swab                          |                                     | 7.2  |       |      |
|                                                | Sample Kits or Abbott R multi-Collect Specimen Collection Kit | Self-taken pharyngeal swab                      |                                     | 1.8  |       |      |
|                                                |                                                               | Self-taken urine                                |                                     | 1.9  |       |      |

|                                                 |                                     |                                            |                                  |      |                  |                  |
|-------------------------------------------------|-------------------------------------|--------------------------------------------|----------------------------------|------|------------------|------------------|
| <b>Regimbal-Éthier et al. 2018<sup>24</sup></b> | and Copan UriSwab™<br>Not specified | Not specified                              |                                  | 6.5  |                  |                  |
| <b>Sambri et al. 2013<sup>25</sup></b>          | Anyplex II STI-7                    | Self-taken vaginal                         |                                  | 2.6  |                  |                  |
| <b>Schick et al. 2015<sup>26</sup></b>          | COBAS Amplicor CT, NG Test          | Self-taken pharyngeal, vaginal, and rectal |                                  | 6.8  |                  |                  |
| <b>Sexton et al. 2013<sup>27</sup></b>          | Aptima combo 2                      | Self-taken rectal swab                     | Clinician taken rectal swab      | 11.6 | 100.0            | 98.8             |
|                                                 |                                     | Self-taken pharyngeal swab                 | Clinician taken pharyngeal swab  | 0.8  | 100.0            | 99.5             |
| <b>Shipitsyna et al. 2013<sup>28</sup></b>      | AmpliSens Ct, GC MULTIPRIME-FRT     | Self-taken urine                           |                                  | 6.5  |                  |                  |
| <b>Silva al. 2020<sup>29</sup></b>              | Metabion                            | Self-taken vaginal                         |                                  | 6.6  |                  |                  |
| <b>van de Wijert et al. 2006<sup>30</sup></b>   | COBAS Amplicor CT, NG Test          | Self-sampled vaginal tampon                | Clinician-collected vaginal swab | 8.8  | 90.9 (80.9–100)  | 97.0 (94.9–99.0) |
|                                                 |                                     | Self-sampled vaginal swab                  | Clinician-collected vaginal swab | 9.0  | 80.0 (66.9–93.1) | 98.9 (97.7–100)  |

|                                              |                            |                                                               |                                                          |      |                       |                   |
|----------------------------------------------|----------------------------|---------------------------------------------------------------|----------------------------------------------------------|------|-----------------------|-------------------|
| <b>Van der Helm et al. 2009<sup>31</sup></b> | COBAS Amplicor CT, NG Test | Self-taken rectal swab (MSM)                                  | Clinician-taken rectal                                   | 9.5  | 87.6 (81.0–91.0)      | 98.9 (98.0–99.0)  |
|                                              |                            | Self-taken rectal swab (women)                                | Clinician taken rectal                                   | 8.3  | 88.2 (80.0–93.0)      | 98.9 (98.0–99.0)  |
| <b>Weng et al. 2022<sup>32</sup></b>         | Cobas® 4800 CT/NG          | Self-taken urine                                              |                                                          | 4.3  |                       |                   |
|                                              |                            | Self-taken rectal swab                                        |                                                          | 31.3 |                       |                   |
| <b>Wiesenfeld et al. 2001<sup>33</sup></b>   | Amplicor                   | Self-taken vaginal                                            |                                                          | 8.0  |                       |                   |
| <b>Wilson et al. 2020<sup>34</sup></b>       | Aptima combo 2             | Self-taken rectal swab                                        | Clinician taken rectal swab                              | 13.5 | 97.2 (94.3–98.9)      | 99.8 (99.4–100.0) |
|                                              |                            | Self-taken pharyngeal swab                                    | Clinician taken pharyngeal swab                          | 3.3  | 93.7 (84.5–98.2)      | 99.8 (99.5–100.0) |
| <b>Wilson et al. 2020<sup>35</sup></b>       | Aptima combo 2             | Self-taken triple swab analyzed individually                  | Clinician taken triple swab                              | 15.3 | 99.6 (98.0–100.0)     | 99.5 (99.1–99.8)  |
|                                              |                            | Self-taken vulvovaginal swab (VVS) or first-catch urine (FCU) | Clinician taken pharyngeal and rectal swab               | 12.1 | 79.2 79.2 (73.9–83.9) | 99.9 (99.6–100.0) |
|                                              |                            | Self-taken triple swab pooled and analyzed together           | Clinician taken triple swab pooled and analyzed together | 14.8 | 96.0 (93.0–98.0)      | 99.5 (99.1–99.8)  |

|                                               |                          |                                                 |                                   |      |                  |                   |
|-----------------------------------------------|--------------------------|-------------------------------------------------|-----------------------------------|------|------------------|-------------------|
| <b>Wong et al. 2022</b> <sup>36</sup>         | Aptima Combo 2           | Self-taken rectal swab                          |                                   | 8.5  |                  |                   |
|                                               |                          | Self-taken urine                                |                                   | 2.5  |                  |                   |
| <b>Wood et al. 2014</b> <sup>37</sup>         | Aptima combo2            | Self-taken rectal, pharyngeal and urine (women) |                                   | 13.3 |                  |                   |
| <i>Neisseria gonorrhoeae</i>                  |                          |                                                 |                                   |      |                  |                   |
| <b>Arias et al. 2016</b> <sup>1</sup>         | HerSwab + Aptima combo 2 | Self-taken vaginal swab                         | Clinician taken vaginal swab      | 1.1  | 100.0            | 98.4              |
| <b>Bernstein et al. 2011</b> <sup>2</sup>     | Aptima combo 2           | Self-taken pharyngeal swab                      | Clinician taken pharyngeal swab   | 6.1  | 90.6             | 97.1              |
| <b>Berry and Stanley 2017</b> <sup>3</sup>    | BD Viper XTR             | Self-taken penile meatal swab                   | Self-collected urine sample       | 2.6  | 92.9             | 99.5              |
| <b>Camus et al. 2021</b> <sup>4</sup>         | Copan ESwab & Cobas 4800 | Self-taken vaginal swab                         | Clinician taken vaginal swab      | 1.0  | 99.9 (99.7–100)  | 100 (N/A)         |
| <b>Chai et al. 2010</b> <sup>5</sup>          | Aptima Gen-Probe,        | Self-taken urine and urethral                   |                                   | 1.0  |                  |                   |
| <b>Chernesky, M. et al. 2014</b> <sup>7</sup> | Aptima combo2            | Self-taken cervicovaginal                       |                                   | 0.4  | 100.0            | 100.0             |
| <b>Chinnock, B. et al. 2020</b> <sup>8</sup>  | Cepheid Xpert CT, NG     | Self-taken vaginal swab                         | Clinician taken endocervical swab | 7.4  | 97.4 (88.0–99.0) | 99.8 (99.0–100.0) |
| <b>Charin et al. 2021</b> <sup>6</sup>        | Aptima Combo 2           | Self-taken urine                                |                                   | 0.5  |                  |                   |

|                                               |                                    |                                   |                              |     |       |       |
|-----------------------------------------------|------------------------------------|-----------------------------------|------------------------------|-----|-------|-------|
|                                               |                                    | Self-taken pharyngeal swab        |                              | 2.8 |       |       |
|                                               |                                    | Self-taken rectal                 |                              | 2.2 |       |       |
| <b>De Baetselier et al. 2019<sup>9</sup></b>  | Abbott Real Time (RT) CT, NG assay | Self-taken Urine at home next day | Self-taken urine at clinic   | 1.5 | 100.0 | 99.6  |
| <b>Grabert et. al 2022<sup>12</sup></b>       | Aptima Combo 2                     | Self-taken wet vaginal swab       | Clinician taken vaginal swab | 2.0 | 50.00 | 99.23 |
|                                               |                                    | Self-taken dry vaginal swab       |                              | 2.8 | 60.00 | 98.71 |
| <b>Harvey-Lavoie et al. 2021<sup>13</sup></b> | COBAS 4800 CT/NG                   | Self -taken urine                 |                              | 0.4 |       |       |
|                                               |                                    | Self-taken rectal                 |                              | 2.9 |       |       |
| <b>Holland-Hall et al. 2002<sup>14</sup></b>  | COBAS Amplicor CT, NG Test         | Self-taken endocervical           |                              | 8.5 |       |       |

|                                                |                                                             |                                                 |                                      |     |       |       |
|------------------------------------------------|-------------------------------------------------------------|-------------------------------------------------|--------------------------------------|-----|-------|-------|
| <b>Kanji et al. 2016<sup>15</sup></b>          | Aptima 2 combo                                              | Self-taken cervical                             | Self-taken urine                     |     | 100.0 | 100.0 |
| <b>Ladd et al. 2014<sup>16</sup></b>           | Aptima Gen-Probe,                                           | Self-taken vaginal and rectal                   |                                      | 2.4 |       |       |
| <b>Lockhart et al. 2018<sup>17</sup></b>       | Aptima Cervical Specimen Collection and Transport cytobrush | Self-taken cervicovaginal cytobrush             | Clinician-taken cervicovaginal       | 1.3 | 96.2  | 99.6  |
| <b>Mabonga et al. 2021<sup>18</sup></b>        | ProbeTecTM ET CT, NG test;                                  | Self-taken vaginal and urine                    |                                      | 2.2 |       |       |
| <b>Masek et al. 2009<sup>19</sup></b>          | Aptima combo 2 or Probetec SDA                              | Self-taken vaginal                              | Both tests having concordant results | 1.2 | 100.0 | 99.7  |
| <b>Nodjikouambaye et al. 2019<sup>20</sup></b> | Allplex STI Essential Assay, Seegene,                       | Self-taken veil-based cervicovaginal            | Clinician taken endocervical swab    | 0.8 | 100.0 | 100.0 |
| <b>Perkins et al. 2013<sup>21</sup></b>        | Not reported                                                | Self-taken rectal, pharyngeal and urine (men)   |                                      | 8.5 |       |       |
|                                                | Not reported                                                | Self-taken rectal, pharyngeal and urine (women) |                                      | 3.0 |       |       |
| <b>Platteau et al. 2022<sup>22</sup></b>       | Abbott RealTime CT/NG assay                                 | Self-taken urine or rectal swab                 |                                      | 0.7 |       |       |
| <b>Rahib et al. 2022<sup>23</sup></b>          | Cobas R PCR Dual Swab Sample Kits or                        | Self-taken rectal swab                          |                                      | 4.3 |       |       |



|                                                 |                                                                   |                                           |                                 |     |       |      |
|-------------------------------------------------|-------------------------------------------------------------------|-------------------------------------------|---------------------------------|-----|-------|------|
|                                                 | Abbott R multi-Collect Specimen Collection Kit and Copan UriSwab™ | Self-taken pharyngeal swab                |                                 |     |       |      |
| <b>Rahib et al. 2019<sup>38</sup></b>           | COBAS 6800                                                        | Self-taken urine                          |                                 | 7.2 |       |      |
| <b>Regimbal-Éthier et al. 2018<sup>24</sup></b> | Not specified                                                     | Not specified                             |                                 | 0.5 |       |      |
| <b>Sambri et al. 2013<sup>25</sup></b>          | Anyplex II STI-7                                                  | Self-taken vaginal                        |                                 | 0.0 |       |      |
| <b>Schick et al. 2015<sup>26</sup></b>          | COBAS Amplicor CT, NG Test                                        | Self-taken pharyngeal, vaginal and rectal | Clinician taken rectal swab     | 5.1 | 100.0 | 96.9 |
| <b>Sexton et al. 2013<sup>27</sup></b>          | Aptima combo 2                                                    | Self-taken pharyngeal swab                | Clinician taken pharyngeal swab | 6.3 | 95.8  | 97.1 |
| <b>Shipitsyna et al. 2013<sup>28</sup></b>      | AmpliSens Ct, GC MULTIPRIME-FRT, AmpliSens Ct, GC MULTIPRIME-FRT  | Self-taken vaginal                        |                                 | 0.6 |       |      |
| <b>Silva al. 2020<sup>29</sup></b>              | Metabion                                                          | Self-taken vaginal                        |                                 | 1.3 |       |      |

|                                                |                            |                                                             |                                  |     |                  |                    |
|------------------------------------------------|----------------------------|-------------------------------------------------------------|----------------------------------|-----|------------------|--------------------|
| <b>van de Wijgert et al. 2006<sup>30</sup></b> | COBAS Amplicor CT, NG Test | Self-sampled vaginal tampon                                 | Clinician-collected vaginal swab | 6.1 | 87.5 (73.9–100)  | 97.0 (95.1–99.0)   |
|                                                |                            | Self-sampled vaginal swab                                   | Clinician-collected vaginal swab | 6.3 | 87.5 (73.9–100)  | 98.0 (96.3–99.6)   |
| <b>Van der Helm et al. 2009<sup>31</sup></b>   | COBAS Amplicor CT, NG Test | Self-taken rectal swab (MSM)                                | Clinician taken rectal           | 6.2 | 87.9 (78.0–94.0) | 98.3 (97.0–99.0)   |
|                                                |                            | Self-taken rectal swab (women)                              | Clinician taken rectal           | 1.6 | 84.6 (58.0–96.0) | 99.7 (99.0–100.0)  |
| <b>Wiesenfeld et al. 2001<sup>33</sup></b>     | Amplicor                   | Self-taken vaginal                                          |                                  | 2.0 |                  |                    |
| <b>Weng et al. 2022<sup>32</sup></b>           | Cobas® 4800 CT/NG          | Self-taken urine                                            |                                  | 0.7 |                  |                    |
|                                                |                            | Self-taken rectal swab                                      |                                  | 9.4 |                  |                    |
| <b>Wilson et al. 2020<sup>34</sup></b>         | Aptima combo 2             | Self-taken rectal swab                                      | Clinician taken rectal swab      | 4.5 | 97.6 (91.6–99.7) | 99.6 (99.2–99.9)   |
|                                                |                            | Self-taken pharyngeal swab                                  | Clinician taken pharyngeal swab  | 3.9 | 95.8 (88.3–99.1) | 99.8 (99.5–100.0)  |
| <b>Wilson et al. 2020<sup>35</sup></b>         | Aptima combo 2             | Self-taken triple swab analyzed individually                | Clinician taken triple swab      | 6.4 | 98.3 (93.9–99.8) | 99.5 (99.0–99.8)   |
|                                                |                            | Self-taken Vulvovaginal swab(VVS) or first-catch urine(FCU) | Clinician taken VVS, FCU         | 4.0 | 63.7 (54.1–72.6) | 100.0 (99.8–100.0) |

|                                      |                |                                                     |                                                          |     |                   |                  |
|--------------------------------------|----------------|-----------------------------------------------------|----------------------------------------------------------|-----|-------------------|------------------|
|                                      |                | Self-taken triple swab pooled and analyzed together | Clinician taken triple swab pooled and analyzed together | 6.3 | 98.2 (99.5–100.0) | 99.8 (92.3–99.1) |
| <b>Wong et al. 2022<sup>36</sup></b> | Aptima Combo 2 | Self-taken rectal swab                              |                                                          | 6.8 |                   |                  |
|                                      |                | Self-taken urine                                    |                                                          | 1.6 |                   |                  |
| <b>Wood et al. 2014<sup>37</sup></b> | Aptima combo2  | Self-taken rectal, pharyngeal and urine (women)     |                                                          | 6.3 |                   |                  |

1. Arias MJ, Dan; Gilchrist, Jodi; Luinstra, Kathy; Li, Jenny; Smieja, Marek; Chernesky, Max A. Ease, Comfort, and Performance of the HerSwab Vaginal Self-Sampling Device for the Detection of Chlamydia trachomatis and Neisseria gonorrhoeae. *Sexually Transmitted Diseases* 2016;**43**(2):125-29.
2. Bernstein KTK, Robert P.; Philip, Susan; Freeman, Alexandra H.; Rauch, Leah M.; Klausner, Jeffrey D. Evaluation of self-collected versus clinician-collected swabs for the detection of chlamydia trachomatis and neisseria gonorrhoeae pharyngeal infection among men who have sex with men. *Sexually Transmitted Diseases* 2011;**38**(11):1036-39.
3. Berry L, Stanley B. Comparison of self-collected meatal swabs with urine specimens for the diagnosis of Chlamydia trachomatis and Neisseria gonorrhoeae in men. *J Med Microbiol* 2017;**66**(2):134-36.
4. Camus C, Penaranda G, Khiri H, et al. Acceptability and efficacy of vaginal self-sampling for genital infection and bacterial vaginosis: A cross-sectional study. *PLoS One* 2021;**16**(11 November) (no pagination).
5. Chai SJA, Bulbulgul; Barnes, Mathilda; Jett-Goheen, Mary; Quinn, Nicole; Agreda, Patricia; Hogan, Terry; Gaydos, Charlotte A.; Whittle, Pamela; Jenkins, Wiley D.; Rietmeijer, Cornelis A. Internet-based screening for sexually transmitted infections to reach nonclinic populations in the community: Risk factors for infection in men. *Sexually Transmitted Diseases* 2010;**37**(12):756-63.
6. Charin G, Symonds Y, Scholfield C, et al. Three-site screening for STIs in men who have sex with men using online self-testing in an English sexual health service. *Sex transm infect* 2022.
7. Chernesky M. Comparison of a new aptima specimen collection and transportation kit to I-pap for detection of C trachomatis, N gonorrhoeae and T vaginalis in cervical and vaginal specimens. *Sexually Transmitted Infections* 2011;**87**(SUPPL. 1):A73-A74.
8. Chinnock BFM, Jessica; Yore, Mackensie; Lopez, Diana; Farshidpour, Leyla; Kremer, Mallory. Vaginal self-sampling is not inferior to provider endocervical sampling for gonorrhea and chlamydia diagnosis. *Academic Emergency Medicine* 2020;**27**(Supplement 1):S214-S15.
9. De Baetselier IS, Hilde; Abdellati, Said; De Deken, Benedicte; Cuylaerts, Vicky; Crucitti, Tania; Reyniers, Thijs; Vuylsteke, Bea. Evaluation of the 'Colli-Pee', a first-void urine collection device for self-sampling at home for the detection of sexually transmitted infections, versus a routine clinic-based urine collection in a one-to-one comparison study design: Efficacy and acceptability among MSM in Belgium. *BMJ Open* 2019;**9**(4):e028145.

10. Estcourt CS, Gibbs J, Sutcliffe LJ, et al. The eSexual Health Clinic system for management, prevention, and control of sexually transmitted infections: exploratory studies in people testing for Chlamydia trachomatis. *Lancet Public Health* 2017;**2**(4):e182-e90.
11. Galvez TM, Flores JA, Pérez DG, et al. Concordance between self-sampling and standar endocervical sample collection to identify sexual transmission infections in an urban-rural area of Peru. *Rev Peru Med Exp Salud Publica* 2021;**38**(1):83-88.
12. Grabert BK, Islam JY, Kabare E, et al. Testing for Sexually Transmitted Infection Using Wet and Dry Self-Collected Brush Samples Among Women in Mombasa, Kenya. *Sexually Transmitted Diseases* 2022;**49**(9):E100-E03.
13. Harvey-Lavoie S, Apelian H, Labbé A-C, et al. Community-Based Prevalence Estimates of Chlamydia trachomatis and Neisseria gonorrhoeae Infections Among Gay, Bisexual, and Other Men Who Have Sex With Men in Montréal, Canada. *Sex Transm Dis* 2021;**48**(12):939-44.
14. Holland-Hall CMW, H. C.; Murray, P. J. Self-collected vaginal swabs for the detection of multiple sexually transmitted infections in adolescent girls. *Journal of Pediatric and Adolescent Gynecology* 2002;**15**(5):307-13.
15. Kanji J, Gee S, Smyczek P, et al. Evaluation of Vaginal Specimens for the Detection of C. Trachomatis (CT) and N. Gonorrhoeae (GC) in High Risk Females Attending Sexually Transmitted Infection (STI) Clinics in Alberta, Canada. *STD prevention conference* 2016.
16. Ladd JH, Yu-Hsiang; Barnes, Mathilda; Quinn, Nicole; Jett-Goheen, Mary; Gaydos, Charlotte A. Female users of internet-based screening for rectal STIs: Descriptive statistics and correlates of positivity. *Sexually Transmitted Infections* 2014;**90**(6):485-90.
17. Lockhart AP, Matt; Ting, Jie; Campbell, Sara; Mugo, Nelly; Kwatampora, Jessie; Chitwa, Michael; Kimani, Joshua; Gakure, Anne; Smith, Jennifer S. Prospective Evaluation of Cervicovaginal Self- and Cervical Physician Collection for the Detection of Chlamydia trachomatis, Neisseria gonorrhoeae, Trichomonas vaginalis, and Mycoplasma genitalium Infections. *Sexually Transmitted Diseases* 2018;**45**(7):488-93.
18. Mabonga EM, Joshua K.; Nabaggala, Maria S.; Kiragga, Agnes; Kisakye, Jennifer; Manabe, Yukari C.; Elbireer, Ali; Gaydos, Charlotte A.; Taylor, Chris; Parkes-Ratanshi, Rosalind. Prevalence and predictors of asymptomatic Chlamydia trachomatis and Neisseria gonorrhoeae in a Ugandan population most at risk of HIV transmission. *International Journal of STD and AIDS* 2021;**32**(6):510-16.
19. Masek BJA, Nick; Quinn, Nicole; Aumakhan, Bulbul; Holden, Jeff; Hardick, Andrew; Agreda, Patricia; Barnes, Mathilda; Gaydos, Charlotte A. Performance of three nucleic acid amplification tests for detection of Chlamydia trachomatis and Neisseria gonorrhoeae by use of self-collected vaginal swabs obtained via an internet-based screening program. *Journal of Clinical Microbiology* 2009;**47**(6):1663-67.
20. Nodjikoambaye ZAMB, Ralph-Sydney; Veyer, David; Robin, Leman; Compain, Fabrice; Pere, Helene; Belec, Laurent; Sadjoli, Damtheou; Adawaye, Chatte; Tonen-Wolyec, Serge; Moussa, Ali Mahamat; Koyalta, Donato. Accuracy of curable sexually transmitted infections and genital mycoplasmas screening by multiplex real-time PCR using a self-collected veil among adult women in Sub-Saharan Africa. *Infectious Diseases in Obstetrics and Gynecology* 2019;**2019**:8639510.
21. Perkins RCD, A.; Douglass, G.; Ta, V.; Fomundam, M.; Li, Y.; Plankey, M. Sexually transmitted infection screening among HIV-negative men and women seeking HIV-testing only: Missed opportunity for HIV prevention? *Sexually Transmitted Infections* 2013;**89**(SUPPL. 1).
22. Platteau T, De Baetselier I, Van Mieghem H, et al. Sexually Transmitted Infections and Associated Risk Factors Among Male Clients of Sex Workers: A Cross-Sectional Pilot Project in Antwerp, Belgium. *Front Reprod Health* 2022;**4**:837102-02.
23. Rahib D, Bercot B, Delagreverie H, et al. Online self-sampling kits for human immunodeficiency virus and other sexually transmitted infections: Feasibility, positivity rates, and factors associated with infections in France. *Int J STD AIDS* 2022;**33**(4):355-62.

24. Regimbal-Ethier MB, K.; To, V.; Quesnel, M. Prelib: Evaluating a newly launched Canadian provider of innovative internet-based services for self-directed HIV and STI screening. *HIV Medicine* 2019;**20**(Supplement 9):195.
25. Sambri VD, Giorgio; Farabegoli, Patrizia. How to facilitate and improve screening of sexually-transmitted infections in women population. *Sexually Transmitted Infections* 2017;**93**(Supplement 2):A64-A65.
26. Schick VVDP, Barbara; Dodge, Brian; Baldwin, Aleta; Dennis Fortenberry, J. A mixed methods approach to assess the likelihood of testing for STI using self-collected samples among behaviourally bisexual women. *Sexually Transmitted Infections* 2015;**91**(5):329-33.
27. Sexton MEB, Joseph J.; Nakagawa, Keisuke; Perkins, Rodney; Baker, Daniel C.; Jucha, Brian; Li, Ying; Plankey, Michael W.; Slack, Rebecca S.; Arora, Sameer. How reliable is self-testing for gonorrhea and chlamydia among men who have sex with men? *Journal of Family Practice* 2013;**62**(2):70-78.
28. Shipitsyna EK, T.; Ryzhkova, O.; Krysanova, A.; Grigoryev, A.; Savicheva, A.; Ryzhikh, P.; Guschin, A.; Unemo, M. Prevalence of sexually transmitted infections in young people in St. Petersburg, Russia, as Determined using self-collected non-invasive specimens. *Sexually Transmitted Infections* 2013;**89**(SUPPL. 1).
29. Silva JT, Ana Luisa; Cerqueira, Fatima; Campainha, Rui; Amorim, Jose; Medeiros, Rui. Prevalence of Neisseria gonorrhoeae and Trichomonas vaginalis in Portuguese women of childbearing age. *Journal of Obstetrics and Gynaecology* 2021;**41**(2):254-58.
30. Van De Wijgert JJ, Heidi; Altini, Lydia; De Kock, Alana; Young, Taryn; Williamson, Anna-Lise; Hoosen, Anwar; Coetzee, Nicol. Two methods of self-sampling compared to clinician sampling to detect reproductive tract infections in Gugulethu, South Africa. *Sexually Transmitted Diseases* 2006;**33**(8):516-23.
31. van der Helm JJ, Hoebe CJ, van Rooijen MS, et al. High performance and acceptability of self-collected rectal swabs for diagnosis of Chlamydia trachomatis and Neisseria gonorrhoeae in men who have sex with men and women. *Sex Transm Dis* 2009;**36**(8):493-7.
32. Weng R, Ning N, Zhang C, et al. Acceptability of rectal self-sampling in non-clinical venues for chlamydia and gonorrhoea testing among men who have sex with men: A cross-sectional study in Shenzhen, China. *Front Public Health* 2022;**10**:992773-73.
33. Wiesenfeld HCL, Donna L. B.; Heine, R. Phillips; Krohn, Marijane A.; Bittner, Heather; Kellinger, Kathleen; Shultz, Maryann; Sweet, Richard L. Self-collection of vaginal swabs for the detection of chlamydia, gonorrhoea, and trichomoniasis: Opportunity to encourage sexually transmitted disease testing among adolescents. *Sexually Transmitted Diseases* 2001;**28**(6):321-25.
34. Wilson JDW, Harriet E.; Loftus-Keeling, Michelle; Ward, Helen; Davies, Bethan; Vargas-Palacios, Armando; Hulme, Claire; Wilcox, Mark H. Swab-yourself trial with economic monitoring and testing for infections collectively (SYSTEMATIC): Part 1. A diagnostic accuracy, and cost-effectiveness, study comparing clinician-taken versus self-taken rectal and pharyngeal samples for the diagnosis of gonorrhoea and chlamydia. *Clinical infectious diseases : an official publication of the Infectious Diseases Society of America* 2020.
35. Wilson JD, Wallace HE, Loftus-Keeling M, et al. Swab-yourself trial with economic monitoring and testing for infections collectively (SYSTEMATIC): Part 2. A diagnostic accuracy, and cost-effectiveness, study comparing rectal, pharyngeal and urogenital samples analysed individually, versus as a pooled specimen, for the diagnosis of gonorrhoea and chlamydia. *Clin Infect Dis* 2020.
36. Wong NS, Kwan TH, Chan DPC, et al. Regular Testing of HIV and Sexually Transmitted Infections With Self-Collected Samples From Multiple Anatomic Sites to Monitor Sexual Health in Men Who Have Sex With Men: Longitudinal Study. *JMIR Form Res* 2022;**6**(11):e40996.

37. Wood ME, R.; Grobicki, M. Outreach sexual infection screening and postal tests in men who have sex with men: How do they compare with clinicbased screening? *HIV Medicine* 2014;**15**(SUPPL. 3):32.
38. Rahib DL, Nathalie; Delagreverie, Heloise M.; Gabassi, Audrey; Guigue, Nicolas; Chaix Baudier, Marie-Laure; Bercot, Beatrice; Delaugerre, Constance; Bichard, Iris. Expanding testing strategies in Paris: A free postal comprehensive STI test kit. *Topics in Antiviral Medicine* 2019;**27**(SUPPL 1):21s.
