# Supplementary material for: Self-sampling strategies (with/without digital innovations) in populations at risk ofChlamydia trachomatisandNeisseria gonorrhoeae: a systematic review and meta-analyses
Source: HighWire-hosted journal article supplement (doi:10.1136/sextrans-2022-055557), 2023-03-29
Supplement: sextrans-2022-055557supp005_data_supplement.pdf [file sextrans-2022-055557supp005_data_supplement.pdf]

**Supplementary Table 4. Sensitivity, Specificity and DOR of *Chlamydia Trachomatis* and *Neisseria gonorrhoea* Self-Sampling Based Tests by Country Type and Sampling Sites for High-Income Countries Only with Associated 95% CIs,  $i^2$  Metric, and p-values. Significant Values are Bolded.**

|                                     |                         | <b>Sensitivity</b><br><b>[95% CIs]</b> | <b>p-value</b> | <b>Specificity</b><br><b>[95% CIs]</b> | <b>p-value</b> | <b>DOR</b><br><b>[95% CIs]</b> | <b><math>I^2</math></b> |
|-------------------------------------|-------------------------|----------------------------------------|----------------|----------------------------------------|----------------|--------------------------------|-------------------------|
| <b><i>Chlamydia trachomatis</i></b> | High Income             | 91.6<br>[84.9–95.5]                    | <0.001         | 99.2<br>[98.8–99.4]                    | 0.008          | 1390<br>[551–2940]             | 87.0                    |
|                                     | Vaginal <sup>1</sup>    | 86.0<br>[76.6–92.1]                    | Ref            | 99.7<br>[97.6–100]                     | Ref            | 4060<br>[165–21400]            | 84.2                    |
|                                     | Pharyngeal <sup>1</sup> | 92.5<br>[86.5–95.9]                    | 0.79           | 99.7<br>[99.5–99.8]                    | 0.57           | 4550<br>[1710–9880]            | 0.0                     |
|                                     | Rectal <sup>1</sup>     | 93.1<br>[87.8–96.2]                    | 0.34           | 99.4<br>[98.8–99.7]                    | 0.81           | 2490<br>[638–6770]             | 79.0                    |
|                                     | Low Income              | 70.7<br>[45.7–87.4]                    | Ref            | 98.5<br>[97.9–98.9]                    | Ref            | 181<br>[56–442]                | 81.9                    |
| <b><i>Neisseria gonorrhoea</i></b>  | High Income             | 92.9<br>[88.1–95.9]                    | <0.001         | 97.7<br>[96.9–98.3]                    | 0.25           | 573<br>[307–980]               | 75.2                    |
|                                     | Vaginal <sup>1</sup>    | 86.2<br>[76.0–92.5]                    | Ref            | 99.8<br>[98.6–100]                     | Ref            | 6740<br>[353–33400]            | 70.8                    |
|                                     | Pharyngeal <sup>1</sup> | 94.3<br>[89.6–96.9]                    | 0.07           | 99.3<br>[97.1, 99.8]                   | 0.20           | 3370<br>[422–12600]            | 70.8                    |
|                                     | Rectal <sup>1</sup>     | 91.6<br>[86.0–95.1]                    | 0.27           | 99.2<br>[98.4–99.6]                    | 0.19           | 1620<br>[426–4340]             | 63.8                    |
|                                     | Low Income              | 77.4<br>[61.4–88.0]                    | Ref            | 98.8 [97.9–99.3]                       | Ref            | 309<br>[114–682]               | 74.8                    |

<sup>1</sup> values are for studies from high-income countries only
