# Supplementary material for: Self-sampling strategies (with/without digital innovations) in populations at risk ofChlamydia trachomatisandNeisseria gonorrhoeae: a systematic review and meta-analyses
Source: HighWire-hosted journal article supplement (doi:10.1136/sextrans-2022-055557), 2023-03-29
Supplement: sextrans-2022-055557supp006_data_supplement.pdf [file sextrans-2022-055557supp006_data_supplement.pdf]

**Supplementary Table 5. Sensitivity, Specificity and DOR of *Chlamydia Trachomatis* and *Neisseria gonorrhoea* Self-Sampling Based Tests** with Associated 95% CIs,  $i^2$  metric, and p-values for studies of high quality only (n=7). Significant values are bolded.

|                                     |            | <b>Sensitivity</b><br>[95% CIs] | <b>p-value</b> | <b>Specificity</b><br>[95% CIs] | <b>p-value</b>   | <b>DOR</b><br>[95% CIs] | <b><math>I^2</math></b> |
|-------------------------------------|------------|---------------------------------|----------------|---------------------------------|------------------|-------------------------|-------------------------|
| <b><i>Chlamydia trachomatis</i></b> | Overall    | 91.0<br>[87.3–93.8]             | Ref            | 99.3<br>[98.8–99.6]             | Ref              | 1590<br>[587–3500]      | 88.9                    |
| <b>Sampling Site</b>                | Vaginal    | 86.4<br>[82.5–89.5]             | Ref            | 98.7<br>[97.0–99.5]             | Ref              | 557<br>[192–1280]       | 80.2                    |
|                                     | Pharyngeal | 93.3<br>[87.4–96.5]             | 0.18           | 99.8<br>[99.6–99.9]             | <b>&lt;0.001</b> | 8280<br>[2550–20300]    | 83.5                    |
|                                     | Rectal     | 93.4<br>[87.7–96.6]             | <b>0.034</b>   | 99.4<br>[98.8–99.7]             | <b>0.011</b>     | 3160<br>[641–9650]      | 0                       |
| <b>Study population</b>             | Women      | 90.0<br>[85.1–93.5]             | 0.60           | 99.2<br>[98.4–99.6]             | 0.44             | 1340<br>[393–3390]      | 83.8                    |
|                                     | MSM        | 91.7<br>[83.4–96.0]             | Ref            | 99.5<br>[98.3–99.9]             | Ref              | 4030<br>[322–17800]     | 60.3                    |
| <b><i>Neisseria gonorrhoea</i></b>  | Overall    | 91.4<br>[88.2–93.9]             | 0.78           | 99.3<br>[98.9–99.6]             | 0.98             | 1600<br>[707–3130]      | 80.7                    |
| <b>Sampling site</b>                | Vaginal    | 88.3<br>[82.0–92.6]             | Ref            | 99.0<br>[97.4–99.6]             | Ref              | 902<br>[245–2370]       | 68.2                    |
|                                     | Pharyngeal | 95.6<br>[90.3–98.0]             | 0.054          | 99.8<br>[99.1–99.9]             | <b>0.045</b>     | 12300<br>[2360–38600]   | 72.8                    |
|                                     | Rectal     | 92.6<br>[87.1–95.9]             | 0.35           | 99.4<br>[98.8–99.7]             | 0.23             | 2270<br>[619–5970]      | 0                       |
| <b>Study population</b>             | Women      | 89.4<br>[84.3–92.9]             | 0.54           | 99.4<br>[98.5–99.7]             | 0.89             | 1470<br>[466–3570]      | 67.1                    |
|                                     | MSM        | 92.8<br>[84.1–96.9]             | Ref            | 99.2<br>[97.7–99.7]             | Ref              | 2370<br>[272–9230]      | 74.9                    |
