# Supplementary material for: Self-sampling strategies (with/without digital innovations) in populations at risk ofChlamydia trachomatisandNeisseria gonorrhoeae: a systematic review and meta-analyses
Source: HighWire-hosted journal article supplement (doi:10.1136/sextrans-2022-055557), 2023-03-29
Supplement: sextrans-2022-055557supp008_data_supplement.pdf [file sextrans-2022-055557supp008_data_supplement.pdf]

## SEARCH STRING STRATEGY

### Pubmed

((chlamydia trachomatis[Text Word]) AND/OR (neisseria gonorrhoeae[Text Word]) OR (ct/gc[Text Word])) AND ((self-testing[Text Word] OR self testing[Text Word] OR self-sampling[Text Word] OR self sampling[Text Word])). Filters applied: from 2000/1/1 - 2023/01/6.

### LILACS

(chlamydia trachomatis and neisseria gonorrhoeae or ctgc) AND (self-testing or self testing or self-sampling or self sampling). Filters applied: from 2000/1/1 - 2023/01/6.

### Embase search history

Libraries: Embase <1996 to 2021 Week 47> and Embase Classic+Embase <1947 to 2021 Week 47>

- 1 ((chlamydia trachomatis and neisseria gonorrhoeae) or ctgc).mp. [mp=title, abstract, heading word, drug trade name, original title, device manufacturer, drug manufacturer, device trade name, keyword heading word, floating subheading word, candidate term word] 5566
- 2 limit 1 to yr="2000 -Current" 4245
- 3 (self-testing or self testing or self-sampling or self sampling).mp. [mp=title, abstract, heading word, drug trade name, original title, device manufacturer, drug manufacturer, device trade name, keyword heading word, floating subheading word, candidate term word] 3113
- 4 limit 3 to yr="2000 -Current" 2975
- 5 2 and 4 44
