# Supplementary material for: Self-sampling strategies (with/without digital innovations) in populations at risk ofChlamydia trachomatisandNeisseria gonorrhoeae: a systematic review and meta-analyses
Source: HighWire-hosted journal article supplement (doi:10.1136/sextrans-2022-055557), 2023-03-29
Supplement: sextrans-2022-055557supp009_data_supplement.pdf [file sextrans-2022-055557supp009_data_supplement.pdf]

**Contexte :** *Chlamydia trachomatis* (CT) et *Neisseria gonorrhoeae* (GC) ont été à l'origine de plus de 200 millions de nouvelles infections sexuellement transmissibles (IST) l'année dernière. Les stratégies d'auto-prélèvement, seules ou combinées à des innovations numériques (c'est-à-dire des technologies en ligne, mobiles ou informatiques permettant l'auto-prélèvement), pourraient améliorer les méthodes de dépistage. Les preuves sur toutes les sortes de résultats n'ont pas encore été synthétisées. C'est pourquoi nous avons mené une revue systématique et une méta-analyse pour remédier à cette lacune.

**Méthodes :** Nous avons recherché des rapports sur l'auto-prélèvement pour les tests CT/GC dans trois bases de données (période : du 1er janvier 2000 au 6 janvier 2023). Les résultats que nous avons pris en compte pour l'inclusion étaient : la précision, la faisabilité, ceux centrés sur le patient et l'impact (c'est-à-dire les changements dans le lien avec les soins, les personnes qui testent pour la première fois, l'utilisation, le délai d'exécution ou les références attribuables à l'auto-prélèvement). Nous avons utilisé des modèles de régression bivariés pour faire une méta-analyse des mesures de précision des tests CT/GC auto-prélevés et obtenir des estimations de sensibilité/spécificité groupées. Nous avons évalué la qualité des études à l'aide du « Cochrane Risk of Bias Tool-2 », de l'échelle de « Newcastle-Ottawa » et de l'outil « Quality Assessment of Diagnostic Accuracy Studies-2 ».

**Résultats :** Nous avons résumé les résultats de 45 études portant sur l'auto-prélèvement seul (73,3 % ; 33 sur 45) ou combiné à des innovations numériques (26,7 % ; 12 sur 45) menées dans 10 pays à revenu élevé (PRE ; n=34) et 8 pays à revenu faible/moyen (PRFM ; n=11). 95,6 % (43 sur 45) étaient des études observationnelles, tandis que 4,4 % (2 sur 45) étaient des essais cliniques randomisés. Nous avons noté que la sensibilité regroupée (n=13) pour la CT/GC était plus élevée pour les auto-prélèvements extra-génitaux (>91,6 % (86,0 %-95,1 %)) que pour les auto-prélèvements vaginaux (79,6 % (62,1 %-90)). Les participants ont trouvé l'auto-prélèvement très acceptable (80,0 %-100,0 % ; n=24), mais avaient une préférence variée (23,1 %-83,0 % ; n=16). L'auto-prélèvement a atteint 51,0 %-70,0 % (n=3) des personnes qui se faisait tester pour la première fois et a entraîné 89,0 %-100,0 % (n=3) de liens avec les soins. Les innovations numériques ont entraîné un engagement de 65,0 % à 92 % et des taux d'achèvement de 43,8 % à 57,1 % (n=3). La qualité des études s'est démontrée être variable.

**Discussion :** L'auto-prélèvement avait une sensibilité variable, atteignait les personnes qui se faisaient tester pour la première fois et était accepté avec des liens élevés avec les soins. Nous recommandons l'auto-prélèvement pour la CT/GC dans les PRE, mais des évaluations supplémentaires dans les PRFM. Les innovations numériques ont eu un impact sur l'engagement et peuvent donc réduire les taux de morbidité dans les populations difficiles à atteindre.

**Numéro d'enregistrement PROSPERO :** PROSPERO CRD42021262950.
