# Supplementary figures and images for: Self-sampling strategies (with/without digital innovations) in populations at risk ofChlamydia trachomatisandNeisseria gonorrhoeae: a systematic review and meta-analyses
Source: HighWire-hosted journal article supplement (doi:10.1136/sextrans-2022-055557), 2023-03-29

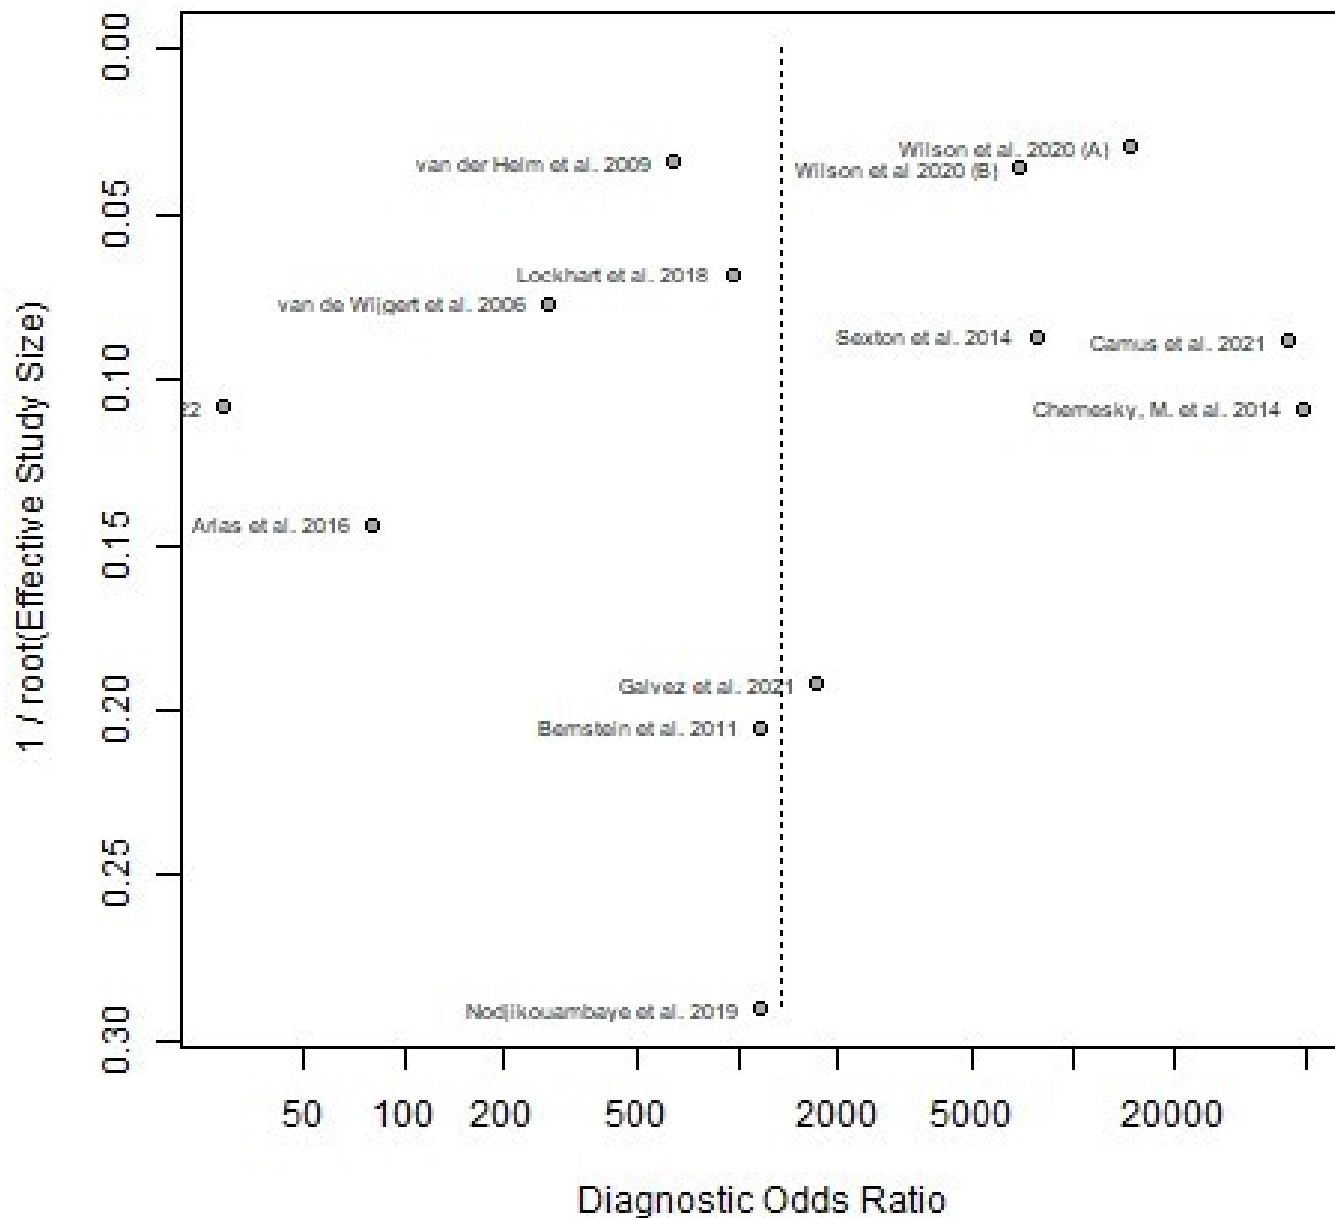

Supplement: sextrans-2022-055557supp001_data_supplement.pdf [file sextrans-2022-055557supp001_data_supplement.pdf]
